# Supplementary material for: Using community-based system dynamics modeling to understand the complex systems that influence health in cities: The SALURBAL study
Source: PubMed Central journal article supplement (PMC6919340; doi:10.1016/j.healthplace.2019.102215), 2019-11
Supplement: mmc2.pdf [file mmc2.pdf]

# What makes cities healthy, equitable and environmentally sustainable?

## *Lessons from Latin America*

Lima, Peru Group Model Building Workshop

November 9, 2017

### *Workshop Agenda*

Created: October 1, 2017

Last revised: November 2, 2017

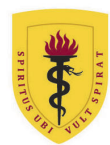

UNIVERSIDAD PERUANA  
CAYETANO HEREDIA

CRONICAS  
CENTRO DE EXCELENCIA EN ENFERMEDADES CRÓNICAS

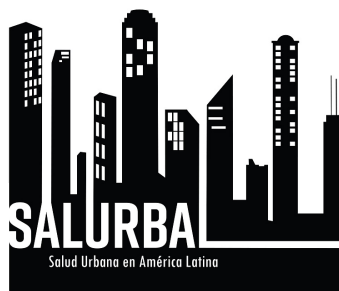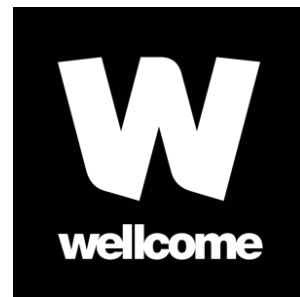

**LAC-URBAN HEALTH**  
Urban Health Network for Latin America and the Caribbean

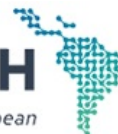

# What makes cities healthy, equitable and environmentally sustainable? Lessons from Latin America

Universidad Peruana Cayetano Heredia  
Lima, Peru  
November 9, 2017

|                                           |           |
|-------------------------------------------|-----------|
| <b>Objectives</b> .....                   | <b>2</b>  |
| <b>Modeling Team</b> .....                | <b>3</b>  |
| <b>Participants:</b> .....                | <b>5</b>  |
| <b>Planning Logistics</b> .....           | <b>5</b>  |
| <b>Agendas</b> .....                      | <b>6</b>  |
| <b>Group Model Building Scripts</b> ..... | <b>15</b> |

## Objectives

### Workshop Objectives (Explicit):

1. Bring diverse stakeholders into an initiative to promote healthy, equitable, and sustainable cities in Latin America
2. Gain experience in application of systems approaches in urban health problems and use of causal loop diagrams to identify and explore policy options
3. Participants will provide input that will help identify and prioritize research questions and practice implications to be pursued by the SALURBAL project using systems modeling in the future

### Workshop Objectives (Implicit):

- Put health and health equity on the agenda of policymakers who may not think their work influences health.
- Learn about and expand mental models of stakeholders (academia, policymakers, banks, civil society) around transportation, food systems, and health
- Identify policy priorities for improving health through transportation and food system intervention and learn what is of value to stakeholders
- Identify common structures/drivers and variations across cities/contexts, and determine whether outputs of these workshops can inform the development of a simulation model
- Assess and test the waters for a potential simulation model/systems approach and dissemination beyond academia

## Modeling Team

### Core Modeling Team

*The core modeling team (CMT) is responsible for the design of the workshop.*

| Role                          | Lima |
|-------------------------------|------|
| Host Representative           |      |
| Modelers                      |      |
| Familiarity with Stakeholders |      |
| Scientific Objectives         |      |
| GMB Process                   |      |

### Facilitation Team

*The facilitation team is responsible for the delivery of the workshop itself. Facilitation team members may be a part of the core modeling team, or could be brought in for the facilitation only.*

| Role                       | Lima |
|----------------------------|------|
| Convener/Closer ***        |      |
| Community Facilitator      |      |
| Modeler Facilitator *      |      |
| Recorder                   |      |
| Process Coach *            |      |
| Reflectors                 |      |
| Production Coordinator *** |      |
| Runners                    |      |
| Wallbuilder **             |      |
| Observer                   |      |

### Facilitation Team Roles

**Meeting Convener/Closer:** Primary responsibility for starting the session, introducing participants to the exercise, making sure that participants understand the purpose of the exercise within the context of their organization or community, and introducing the facilitators. Closer has primary responsibility for bringing the session to close and thanking participants for their time.

**Community Facilitator:** The community facilitator's primary responsibility is to extend their social capital to help the community accept and work with the modeler facilitator. This is a person who is familiar with the local or substantive knowledge of the problem being modeled and knows the local language and community norms in cross-cultural situations. The substantive expert/facilitator should have strong group facilitation skills, some exposure to system dynamics (e.g., through the planning process and training session or workshop), and have sufficient knowledge of the topic and/or community to anticipate and mediate conflicts that might arise within the group model building session.

**Modeler Facilitator:** Primary responsibility for system dynamics modeling and group model building process. This is a person who is trained in systems thinking/system dynamics model with expertise teaching and leading groups in the use of systems/thinking/system dynamics. The person should also have experience facilitating groups and leading group model building sessions. If the goal of the project is to develop a simulation model, it is expected that the modeler/facilitator also be an expert modeler and able to anticipate and address the variety issues that can arise in data and modeling.

**Modeler:** The modeler's primary responsibility is to build the system dynamics causal maps, models, and simulations. This is a person with expertise in system dynamics modeling and software (Vensim, IThink/Stella, etc.), formulating and entering equations, testing and analyzing the model, and running simulations for answering policy questions.

**Note Taker/Time Keeper:** Primary responsibility for taking notes about what is said in the workshop and notifying the facilitation team when time is short. It is overall very important to start and end on time as much as possible.

**Process Coach:** The process coach's primary responsibility is to observe the group process with attention to how participants are experiencing the session. This role requires someone who is able to reflect on the group process and accurately identify what is happening for participants based on observing their behavior and language. The process coach also plays an evaluation role and helps provide accurate feedback to the core modeling team about how the sessions are going. The process coach should be noticing when group dynamics begin to interfere with the process and identify potential solutions.

**Production Coordinator:** The production coordinator's primary responsibility is to ensure that the information collected during the exercises, which includes diagrams, group model building scripts, agenda, pictures, notes, electronic versions of diagrams, etc., are collected, appropriately archived, and made available.

**Reflector:** Primary responsibility for helping the group reflect on what they have done so far and recognize the issues/insights that have been developed during the modeling. This role requires someone who can speak to the relevance of the activities and insights to a larger substantive context, or to system dynamics modeling more generally.

**Runner:** Primary responsibility is to be available to solve logistical problems as they emerge – including technical assistance, materials, etc. These people can also be on hand to support with wall building.

**Wall Builder:** The primary responsibility of the wall builder is to organize products from an exercise into thematic clusters, as well as to explain the clusters to the participants in order to elicit their feedback.

## Participants:

| Country       | Stakeholder type                | Name | Professional title | Institution | Expertise |
|---------------|---------------------------------|------|--------------------|-------------|-----------|
| Argentina     | Subject matter expert           |      |                    |             | Food      |
| Brazil        | Policymaker                     |      |                    |             | Food      |
| Chile         | Policymaker                     |      |                    |             | Food      |
| Peru          | Policymaker                     |      |                    |             | Food      |
| Peru          | NGO Rep                         |      |                    |             | Food      |
| Peru          | Subject matter expert           |      |                    |             | Food      |
| Peru          | Policymaker                     |      |                    |             | Food      |
| Peru          | NGO Rep                         |      |                    |             | Food      |
| Peru          | NGO Rep                         |      |                    |             | Food      |
| Peru          | Subject matter expert           |      |                    |             | Food      |
| Peru          | Dev Bank Rep                    |      |                    |             | Food      |
| Argentina     | Subject matter expert           |      |                    |             | Transport |
| Chile         | NGO/CSO / Subject matter expert |      |                    |             | Transport |
| Chile         | Biostatistician                 |      |                    |             | Transport |
| Peru          | Policymaker                     |      |                    |             | Transport |
| Peru          | Subject matter expert           |      |                    |             | Transport |
| Peru          | NGO Rep                         |      |                    |             | Transport |
| Peru          | Policymaker                     |      |                    |             | Transport |
| Peru          | NGO Rep                         |      |                    |             | Transport |
| Peru          | NGO Rep                         |      |                    |             | Transport |
| Peru          | Policymaker                     |      |                    |             | Transport |
| USA/ Colombia | Dev. Bank Rep                   |      |                    |             | Transport |

## Planning Logistics

### Space Requirements

- 1 room with 40 person capacity

- 2 breakout rooms with 15-20 person capacity
- Wall space for chart paper
- Projector screen & projector
- Food and drink (coffee, etc)

### Materials Needed

- Digital projector
- Fat flip chart markers (at least one per participant)
- White printer paper
- Blue printer paper
- Yellow printer paper
- Blue painter's tape
- Flip charts
- Colorful 1-in dot stickers (the kind that are used in yard sales)
- Name tags

## Agendas

### Summary Agenda

| <b>Activity</b>                           | <b>Duration</b> | <b>Time</b> |
|-------------------------------------------|-----------------|-------------|
| Participants Arrive                       | 30 min          | 800-830     |
| Welcome & Introductions                   | 20 min          | 830-850     |
| General presentation                      | 40 min          | 850-930     |
| Hopes & Fears                             | 45 min          | 930-1015    |
| Graphs Over Time (Break out rooms)        | 40 min          | 1015-1055   |
| Dots (Break out rooms)                    | 5 min           | 1055-1100   |
| <i>Break</i>                              | 15 min          | 1100-1115   |
| Causal Loop Diagramming (Break out rooms) | 1 hr            | 1115-1215   |
| Presentations (Break out rooms)           | 30 min          | 1215-1245   |
| <i>Lunch</i>                              | 1.5 hr          | 1245-215    |
| Model synthesis                           | 1 hr            | 215-315     |
| <i>Break</i>                              | 15 min          | 315-330     |
| Action Ideas (Break out rooms)            | 55 min          | 330-425     |
| Dots (Break out rooms)                    | 5 min           | 425-430     |
| Reflection                                | 20 min          | 430-450     |
| Close                                     | 10 min          | 450-500     |

## Anticipated Outputs

| <b>Activity</b>                                         | <b>Output</b>                                                      |
|---------------------------------------------------------|--------------------------------------------------------------------|
| Welcome                                                 | --                                                                 |
| General presentation                                    |                                                                    |
| Hopes & Fears                                           | List of hopes & fears                                              |
| Graphs Over Time (Food Systems & Transportation)        | Transport BOTGs<br>Food system BOTGs<br>Clusters/themes            |
| Dots                                                    | Ranking of relative importance of BOTGs                            |
| Break                                                   |                                                                    |
| Causal Loop Diagramming (Food Systems & Transportation) | Transport CLD x 2-3<br>Food Systems CLD x 2-3                      |
| Presentations                                           | --                                                                 |
| <i>Lunch</i>                                            |                                                                    |
| Model synthesis                                         | 2 synthesis CLDs;<br>Identification of common structures/variables |
| Action Ideas (Food Systems & Transportation)            | List of action ideas, ranked by feasibility, potential impact      |
| Dots                                                    | Ranking of importance of variables in synthesis CLDs               |
| Reflection                                              | Notes on key points                                                |
| Close                                                   |                                                                    |

## Detailed Agenda

| <b>Time</b> | <b>Activity</b>                                             | <b>Roles</b>                      | <b>Description</b>                                                                                                                                                                                                                                                                                                                                     |
|-------------|-------------------------------------------------------------|-----------------------------------|--------------------------------------------------------------------------------------------------------------------------------------------------------------------------------------------------------------------------------------------------------------------------------------------------------------------------------------------------------|
| 7:30-8:00   | Room Setup                                                  |                                   |                                                                                                                                                                                                                                                                                                                                                        |
| 8:00-8:30   | Participants arrive                                         |                                   | Folks will arrive                                                                                                                                                                                                                                                                                                                                      |
| 8:30-8:50   | Welcome & Introductions<br><br><i>Apertura y bienvenida</i> | Convener:                         | Key points: <ul style="list-style-type: none"> <li>• Introduction of facilitation team</li> <li>• Introduction of participants</li> <li>• Summary of goals and agenda for the day</li> <li>• <i>Presentación del equipo de facilitación y sus roles</i></li> <li>• <i>Revisión de los objetivos</i></li> <li>• <i>Revisión de la agenda</i></li> </ul> |
| 8:50-9:30   | Presentation                                                | SALURBAL :<br>Systems approaches: | Potential talking points: <ul style="list-style-type: none"> <li>• Latin American health in cities</li> <li>• Integrating research and policy</li> <li>• Systems approaches in general</li> <li>• Examples of GMB in other contexts</li> </ul> <p>Goal: communicate the dual benefit of this workshop for research and for stakeholders themselves</p> |

|             |                                                                                              |                                                                                                                                                        |                                                                                                                                                                                                                                                                                                                                                                                                                                                                                                                                                                                                                                                                                                                                                                                                                                                                                                                                                                                                                                                                                                                                                                                                                        |
|-------------|----------------------------------------------------------------------------------------------|--------------------------------------------------------------------------------------------------------------------------------------------------------|------------------------------------------------------------------------------------------------------------------------------------------------------------------------------------------------------------------------------------------------------------------------------------------------------------------------------------------------------------------------------------------------------------------------------------------------------------------------------------------------------------------------------------------------------------------------------------------------------------------------------------------------------------------------------------------------------------------------------------------------------------------------------------------------------------------------------------------------------------------------------------------------------------------------------------------------------------------------------------------------------------------------------------------------------------------------------------------------------------------------------------------------------------------------------------------------------------------------|
| 9:30-10:15  | <p>Hopes &amp; Fears</p> <p><i>Aspiraciones y preocupaciones</i></p>                         | <p>Community facilitator:</p> <p>Wallbuilder:</p>                                                                                                      | <p>Community facilitator asks participants to write hopes and fears for the workshop on pieces of blue (fear) and yellow (hope) paper. She highlights that one participants should write one hope or fear per paper.</p> <p>Gives 5 minutes to write as many hopes and fears as can think of.</p> <p>With 1 minute left, ask participants to stack their hopes and their fears with the most important ones on top.</p> <p>After 5 minutes, the facilitator asks someone to share 1 hope and 1 fear.</p> <p>Modeler facilitator will take the hopes and fears and cluster them on the wall.</p> <p>After 1-2 rounds of sharing, modeler facilitator will summarize the hopes and fears, highlighting thematic clusters, and asking for additional observations.</p> <p>Example hopes and fears:</p> <ul style="list-style-type: none"> <li>• Preocupaciones necesarias: <ul style="list-style-type: none"> <li>○ Gente entrando y saliendo del taller para atender otros asuntos</li> <li>○ Perdemos mucho tiempo en los recesos porque la gente se tarda en regresar</li> </ul> </li> <li>• Aspiraciones necesarias:</li> </ul> <p>La opinión de todos tiene el mismo peso y todos pueden participar abiertamente</p> |
| 1015-1020   | <i>Move to breakout rooms</i>                                                                |                                                                                                                                                        |                                                                                                                                                                                                                                                                                                                                                                                                                                                                                                                                                                                                                                                                                                                                                                                                                                                                                                                                                                                                                                                                                                                                                                                                                        |
| 10:20-10:55 | <p>Graphs Over Time</p> <p>(split food systems &amp; transportation into separate rooms)</p> | <p><b>Food group</b></p> <p>Modeler facilitator:</p> <p>Wallbuilder:</p> <p><b>Transport group</b></p> <p>Modeler facilitator:</p> <p>Wallbuilder:</p> | <p>With each group (food &amp; transport), the Modeler facilitator introduces the graphs over time by highlighting that it's easy to come up with explanations about why we behave the way we do, but we need to really think deeper. What's true today may not have been true before...He provides 2 examples. The examples will highlight two criteria: demonstrating multiple time horizons, and demonstrating tangible and intangible variables.</p> <p>Options (to be confirmed Wednesday 8 Nov):</p> <ul style="list-style-type: none"> <li>• Endangered species</li> <li>• Coffee consumption</li> <li>• Sleep</li> <li>• Energy level</li> </ul> <p>Each modeler facilitator will ask participants in their respective groups to draw as many graphs over</p>                                                                                                                                                                                                                                                                                                                                                                                                                                                  |



|  |  |                                                                                                                                                                                                                                                                                                                                                                                                                                                                                                                                                                                                                                                                                                                                                                                                                                                                                                                                                                                                                                                                                                                                                                                                                                                                                                                                                                                                                                                                                                                                                                                                                                                                                                                                                                                                                                                                                                         |
|--|--|---------------------------------------------------------------------------------------------------------------------------------------------------------------------------------------------------------------------------------------------------------------------------------------------------------------------------------------------------------------------------------------------------------------------------------------------------------------------------------------------------------------------------------------------------------------------------------------------------------------------------------------------------------------------------------------------------------------------------------------------------------------------------------------------------------------------------------------------------------------------------------------------------------------------------------------------------------------------------------------------------------------------------------------------------------------------------------------------------------------------------------------------------------------------------------------------------------------------------------------------------------------------------------------------------------------------------------------------------------------------------------------------------------------------------------------------------------------------------------------------------------------------------------------------------------------------------------------------------------------------------------------------------------------------------------------------------------------------------------------------------------------------------------------------------------------------------------------------------------------------------------------------------------|
|  |  | <p>time as they can in the next 5 minutes. The prompts used to facilitate this activity will be as follows:</p> <p><b>Food systems group PROMPT:</b></p> <p>“Por favor piense en un factor que inflencie la alimentación saludable en las ciudades.</p> <p>En cada hoja de papel dibuje la trayectoria, a través del tiempo, de un factor que inflencie la alimentación saludable en las ciudades. Por favor incluya en la misma gráfica, una trayectoria que usted aspira que ocurra y una trayectoria la cual le preocupa que ocurra.”</p> <p><b>Transport group PROMPT:</b></p> <p>“Por favor piense en un factor de la movilidad y del transporte que tenga influencia sobre la salud de las ciudades</p> <p>En cada hoja de papel dibuje la trayectoria, a través del tiempo, de un factor de la movilidad y del transporte que tenga influencia sobre la salud de la ciudades. Por favor incluya en la misma gráfica, una trayectoria que usted aspira que ocurra y una trayectoria la cual le preocupa que ocurra.”</p> <p>Participants have <b>5 minutes</b> to draw the graphs, but this can be monitored and extended/shortened by a few minutes if necessary. At 4 minutes, a <b>1-minute warning</b> is given and they are asked to begin stacking their graphs over time with the most important/favorite on top and least important/least favorite on the bottom.</p> <p>Modeler facilitator then calls a stop and then goes around using a nominal group technique where each person identifies their top graph over time and explains the graph, which is handed to Wallbuilder (who clusters the behavior over time graphs (BOTGs) on the wall.</p> <p>In their respective groups, community facilitators then review the clusters and themes, highlighting uncertainty in her choices, and asks participants if there are any changes to be made in where each graph is situated.</p> |
|--|--|---------------------------------------------------------------------------------------------------------------------------------------------------------------------------------------------------------------------------------------------------------------------------------------------------------------------------------------------------------------------------------------------------------------------------------------------------------------------------------------------------------------------------------------------------------------------------------------------------------------------------------------------------------------------------------------------------------------------------------------------------------------------------------------------------------------------------------------------------------------------------------------------------------------------------------------------------------------------------------------------------------------------------------------------------------------------------------------------------------------------------------------------------------------------------------------------------------------------------------------------------------------------------------------------------------------------------------------------------------------------------------------------------------------------------------------------------------------------------------------------------------------------------------------------------------------------------------------------------------------------------------------------------------------------------------------------------------------------------------------------------------------------------------------------------------------------------------------------------------------------------------------------------------|

|             |                                                                                                                               |                      |                                                                                                                                                                                                                                                                                                                                                                                                                                    |
|-------------|-------------------------------------------------------------------------------------------------------------------------------|----------------------|------------------------------------------------------------------------------------------------------------------------------------------------------------------------------------------------------------------------------------------------------------------------------------------------------------------------------------------------------------------------------------------------------------------------------------|
| 10:55-11:00 | Dots (split food systems & transportation into separate rooms)                                                                | Modeler Facilitator: | Modeler facilitator asks participants to take the dots they have in their tables and vote for which are the most important drivers of community trends over time. They can vote 5 times for the same graph, or one for each. Colors don't matter.                                                                                                                                                                                  |
| 11:00-11:15 | Break                                                                                                                         |                      |                                                                                                                                                                                                                                                                                                                                                                                                                                    |
| 11:15-11:30 | Introduction to CLDs<br><i>Introducción a mapas causales</i><br><br>(split food systems & transportation into separate rooms) | Modeler Facilitator: | <p>First, the facilitator will tell a story of chickens reproducing, population growth, overcrowding, and injuries</p> <p>Then, the facilitator will present 2 graphs over time to describe these dynamics – of chicken population growth and stabilization, and of injuries.</p> <p style="text-align: center;"><b>Chicken Population</b></p> 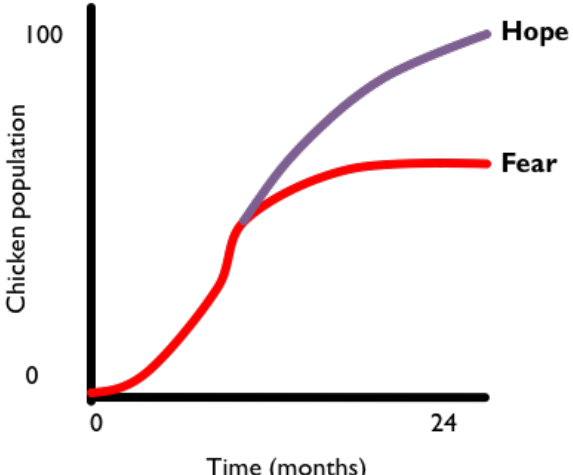 |

|             |                                                                                |                                                           |                                                                                                                                                                                                                                                                                                                                                                                                                                                                                                                                                                                                                                                                                                                                                                                                               |
|-------------|--------------------------------------------------------------------------------|-----------------------------------------------------------|---------------------------------------------------------------------------------------------------------------------------------------------------------------------------------------------------------------------------------------------------------------------------------------------------------------------------------------------------------------------------------------------------------------------------------------------------------------------------------------------------------------------------------------------------------------------------------------------------------------------------------------------------------------------------------------------------------------------------------------------------------------------------------------------------------------|
|             |                                                                                |                                                           | <p style="text-align: center;"><b>Chicken Injuries</b></p> 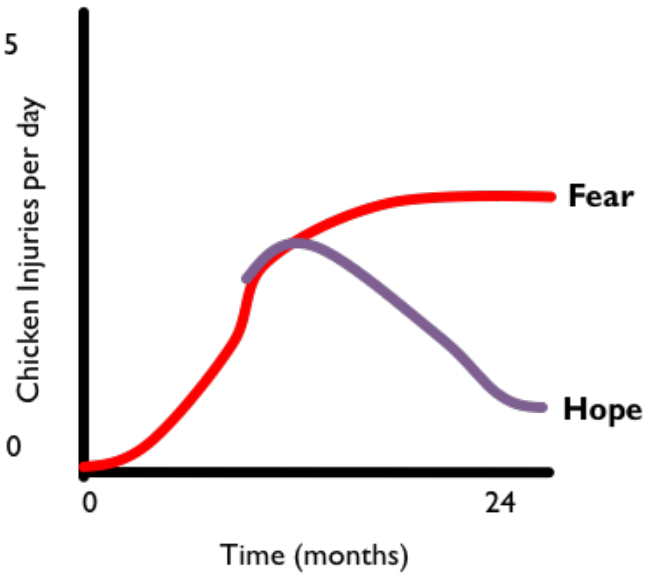 <p>The facilitator then describes a set of feedback loops as a dynamic hypothesis of a structure that may create this behavior</p>  <p>The presentation will highlight:</p> <ol style="list-style-type: none"> <li>1. polarity,</li> <li>2. variable definition</li> <li>3. feedback</li> <li>4. Delays</li> </ol> <p>The facilitator emphasizes that the CLD is a hypothesis about the structures that could create the behavior. He then asks if there are other factors or structures, and can add on other sources of injuries, other factors that reduce eggs, etc.</p> |
| 11:30-12:15 | <p>Causal Loop Diagramming</p> <p><i>Trabajo en grupos: mapas causales</i></p> | <p>Modeler Facilitator:</p> <p>Community Facilitator:</p> | <p>Within the food systems and transport groups, people will randomly be assigned (by counting off) to one of 2-3 subgroups (each made up of 3-4 people).</p> <p>Each subgroup will work on building their own causal loop diagram. Diagramming by the food groups will be facilitated by the prompt:</p>                                                                                                                                                                                                                                                                                                                                                                                                                                                                                                     |

|             |                                                           |                                                           |                                                                                                                                                                                                                                                                                                                                                                                                                                                                                                                                                                                                                                                                                                                                                                                                                                                                                                                                                                                                                                                                                                                                              |
|-------------|-----------------------------------------------------------|-----------------------------------------------------------|----------------------------------------------------------------------------------------------------------------------------------------------------------------------------------------------------------------------------------------------------------------------------------------------------------------------------------------------------------------------------------------------------------------------------------------------------------------------------------------------------------------------------------------------------------------------------------------------------------------------------------------------------------------------------------------------------------------------------------------------------------------------------------------------------------------------------------------------------------------------------------------------------------------------------------------------------------------------------------------------------------------------------------------------------------------------------------------------------------------------------------------------|
|             | (split food systems & transportation into separate rooms) |                                                           | <p><b>Build a causal loop diagram that explains a hypothesis of the food systems/transportation system factors that influence a healthy urban environment.</b></p> <p>While groups work, the facilitation team will circulate, asking questions and providing guidance if folks are stuck.</p> <p>With 5 minutes left Modeler facilitators give a 5-minute warning and ask folks to focus on consequences of target behavior, closing feedback loops.</p>                                                                                                                                                                                                                                                                                                                                                                                                                                                                                                                                                                                                                                                                                    |
| 12:15-12:45 | Presentations                                             | Community Facilitator:                                    | <p>Teams will present their models to the larger group, focusing on highlighting feedback loops and key stories.</p> <p><i>[Meanwhile modelers begin synthesizing CLD with the aim of creating two causal loop diagrams: 1 for food systems, and one for transport.]</i></p>                                                                                                                                                                                                                                                                                                                                                                                                                                                                                                                                                                                                                                                                                                                                                                                                                                                                 |
| 12:45-2:15  | Lunch                                                     |                                                           | <i>[Modelers continue synthesizing CLD]</i>                                                                                                                                                                                                                                                                                                                                                                                                                                                                                                                                                                                                                                                                                                                                                                                                                                                                                                                                                                                                                                                                                                  |
| 2:15-3:15   | Model Synthesis                                           | <p>Modeler Facilitator:</p> <p>Community Facilitator:</p> | <p>Modeler facilitator will describe how over lunch, the facilitation team reviewed the models and created a united conceptual model, one for food and one for transport, that links all of the CLDs that were developed in the first session. Then, one at a time, the modeler facilitators will project the synthesized causal loop diagram (created using Vensim) for food systems and transport.</p> <p>Modeler facilitator then describe how the CLDs were constructed using the input of the morning's CLD's, highlighting key stories and ideas.</p> <p>The Modeler facilitator then leads a conversation with the team to review whether the model accurately captures the stories of the group, or whether there are new perspectives to be included.</p> <p>Community facilitator will facilitate conversations among participants and ask clarifying questions.</p> <p>Modeler facilitator will make revisions to the model based on proposed changes. The goal is to converge on a consensus view of the problem from a feedback perspective. We will revise the model until no one has adjustments or disagreements to add.</p> |

|           |                                                                                                                                                                                                          |                                                    |                                                                                                                                                                                                                                                                                                                                                                                                                                                                                                                                                                                                                                                                                                                                                                                                                                                                                                                                                                                                                                                                                                                                                                                                                                                                                                                                                                                                                                                                                                                                                                                                                                                        |
|-----------|----------------------------------------------------------------------------------------------------------------------------------------------------------------------------------------------------------|----------------------------------------------------|--------------------------------------------------------------------------------------------------------------------------------------------------------------------------------------------------------------------------------------------------------------------------------------------------------------------------------------------------------------------------------------------------------------------------------------------------------------------------------------------------------------------------------------------------------------------------------------------------------------------------------------------------------------------------------------------------------------------------------------------------------------------------------------------------------------------------------------------------------------------------------------------------------------------------------------------------------------------------------------------------------------------------------------------------------------------------------------------------------------------------------------------------------------------------------------------------------------------------------------------------------------------------------------------------------------------------------------------------------------------------------------------------------------------------------------------------------------------------------------------------------------------------------------------------------------------------------------------------------------------------------------------------------|
|           |                                                                                                                                                                                                          |                                                    |                                                                                                                                                                                                                                                                                                                                                                                                                                                                                                                                                                                                                                                                                                                                                                                                                                                                                                                                                                                                                                                                                                                                                                                                                                                                                                                                                                                                                                                                                                                                                                                                                                                        |
| 3:15-3:30 | Break                                                                                                                                                                                                    |                                                    |                                                                                                                                                                                                                                                                                                                                                                                                                                                                                                                                                                                                                                                                                                                                                                                                                                                                                                                                                                                                                                                                                                                                                                                                                                                                                                                                                                                                                                                                                                                                                                                                                                                        |
| 3:30-4:25 | <p>Action Ideas – split Transportation &amp; Food systems</p> <p><i>Identificar propuestas de intervenciones e innovaciones</i></p> <p>(split food systems &amp; transportation into separate rooms)</p> | <p>Community Facilitators:</p> <p>Wallbuilder:</p> | <p>The community facilitator presents on different types of system interventions, from accelerating feedback loops to creating information flows, highlighting that a change to a parameter is often the easiest but lowest leverage change we can make.</p> <p>Community facilitator asks participants to think about ways we can intervene in this system. He asks teams to come up with their top 4 system interventions, written on a white piece of paper, and plan to map these onto the model.</p> <p>At the end of 5 minutes, the facilitator asks for a volunteer group to share.</p> <p>The first group should describe how they would intervene in the system, how it would impact system performance, unintended or secondary consequences. They will then propose where to put the intervention on the matrix of feasibility and potential impact.</p> <p>The wallbuilder places the action idea on the wall based on this recommendation.</p> <ul style="list-style-type: none"> <li>• Introducción a la identificación de intervenciones (15 minutos) <ul style="list-style-type: none"> <li>○ Ahora trabajarán en los mismos grupos para identificar intervenciones e innovaciones para influenciar los resultados de los mapas</li> <li>○ Dibujar cada intervención e innovación en el mapa y en una <b>post-it</b></li> </ul> </li> <li>• Trabajo en grupos (30 minutos)</li> <li>• Presentación de ideas y colocación de intervenciones en cuadrantes (45 minutos) <ul style="list-style-type: none"> <li>○ Eje X: Impacto potencial</li> <li>○ Eje Y: Dificultad de implementar (costos, complejidad, etc.)</li> </ul> </li> </ul> |
| 4:25-4:30 | Dots                                                                                                                                                                                                     | Community Facilitator:                             | Community facilitator distributes 6 blue dots to transport experts and yellow dots to food experts.                                                                                                                                                                                                                                                                                                                                                                                                                                                                                                                                                                                                                                                                                                                                                                                                                                                                                                                                                                                                                                                                                                                                                                                                                                                                                                                                                                                                                                                                                                                                                    |

|           |                                  |             |                                                                                                                                                                                                                                                                                    |
|-----------|----------------------------------|-------------|------------------------------------------------------------------------------------------------------------------------------------------------------------------------------------------------------------------------------------------------------------------------------------|
|           |                                  |             | <p>Community facilitator then asks participants to take the dots they have on their tables and vote for the <b>most important factors</b> shaping health in cities. They can vote 6 times for the same factor, or one for each.</p> <p><b>Focus on: Most important factors</b></p> |
| 4:30-4:50 | Reflection<br><i>Reflexiones</i> | Reflectors: | <p>Reflectors will reflect on the day's activities, focusing on the perspectives of:</p> <ol style="list-style-type: none"> <li>1. Lima/Peruvian stakeholders</li> <li>2. Research perspective,</li> <li>3. Modeling perspective.</li> </ol>                                       |
| 4:50-500  | Closing                          | Closer:     |                                                                                                                                                                                                                                                                                    |

## Group Model Building Scripts

*The following scripts were used in the group model building workshop. Scripts are structured small group exercises used in group model building. These scripts are compiled in a wikibook called Scriptapedia which is intended to be a freely distributed book and easily edited to support the creation of new scripts, discussion of what works and what doesn't, and internationalization of group model building practice. Scriptapedia is available at <https://en.wikibooks.org/wiki/Scriptapedia>.*

### License

Scriptapedia is shared under the Creative Commons Attribution-ShareALike 3.0 Unported License. Anyone is free to share (copy, distribute, and transmit the work) and remix (adapt the work) under the following conditions: (1) users must attribute the work in a manner specified by the author of the content, but not so in a way that suggests that they endorse or are using adaptation, and (2) if a user alters, transforms, or builds upon another author or authors' works, users can distribute the resulting working only under the same or similar license as this one. With this understanding, any of the above conditions can be waived if the user gets permission from the copyright holder. If any or all of the elements of the work is already in public domain under applicable law, that status is in no way affected by the license. In no way are any of the following rights affected by the license: (1) users fair dealing or fair use rights, or other applicable copyright exceptions and limitations; (2) author's moral rights, and (3) rights other persons may have either in the work itself or in how the work is used, such as publicity or privacy rights. For any reuse or distribution, the user reusing or distributing the Molecule Library and its contents must make clear to others the license terms of this work. The best way to do this is by copying this page or linking to the Creative Commons Attribution-ShareALike 3.0 Unported License website.
